# Supplementary material for: deepAMPNet: a novel antimicrobial peptide predictor employing AlphaFold2 predicted structures and a bi-directional long short-term memory protein language model
Source: PeerJ journal article supplement (doi:10.7717/peerj.17729), 2024-07-19

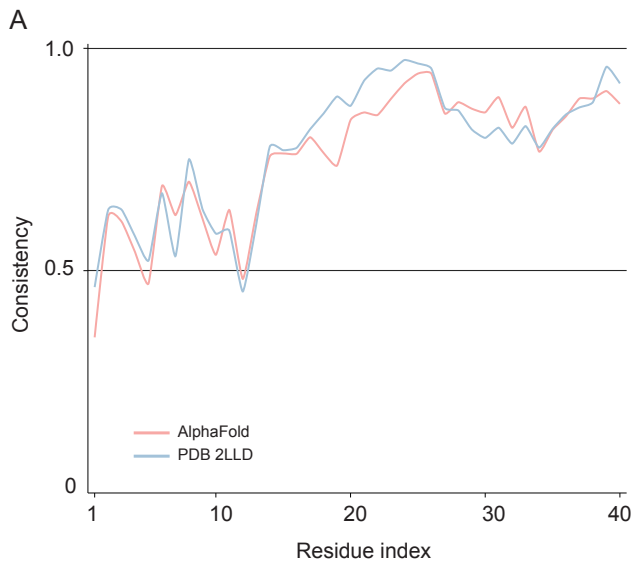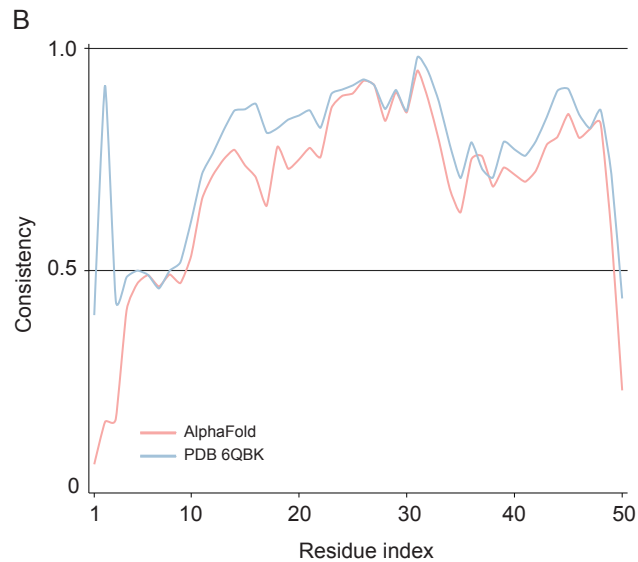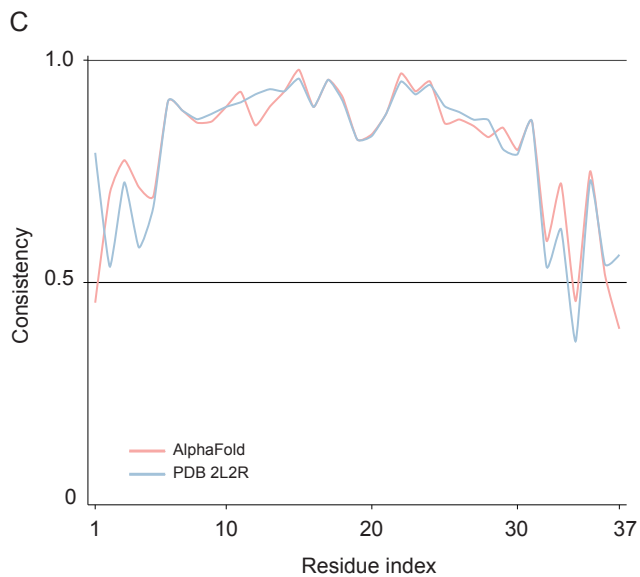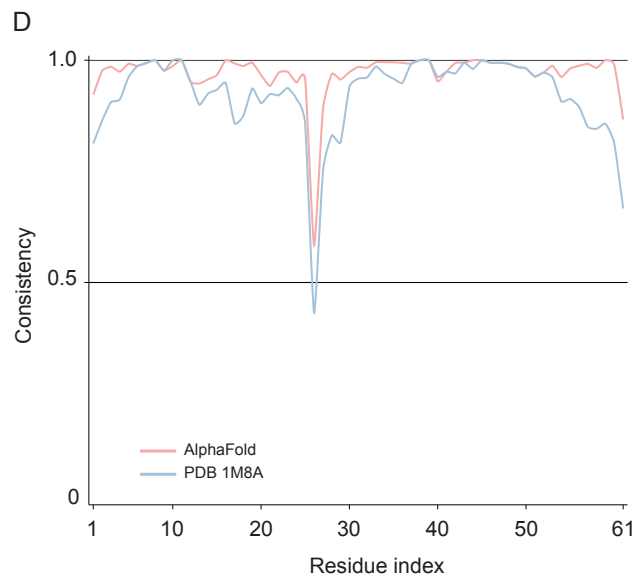

Supplement: Figure_S2.pdf [file Figure_S2.pdf]
